# Supplementary material for: A Predictive Model to Identify Complicated Clostridiodes difficile Infection
Source: bioRxiv or medRxiv preprint supplement (doi:10.1101/2022.05.18.22275113), 2022-05-22

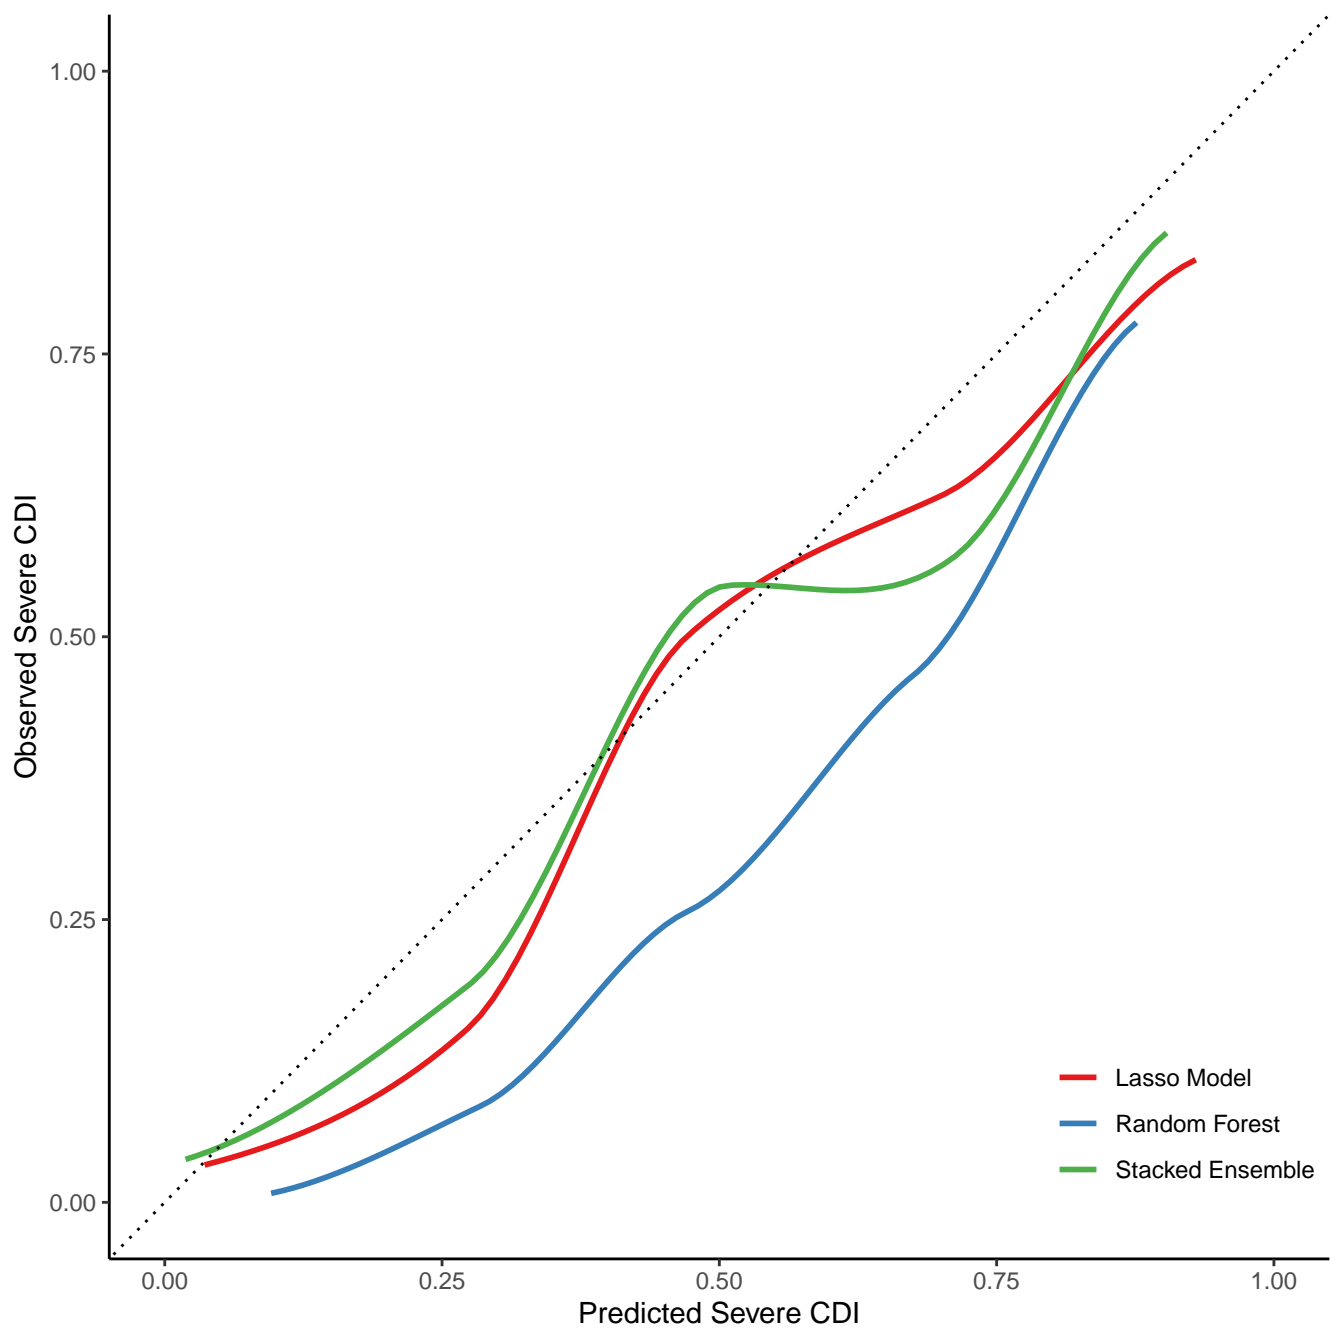

Supplement: Supplementary file [file media-1.pdf]
